# Supplementary material
Source: PubMed Central journal article supplement (PMC3993461)
Supplement: IAI.01491-14_zii999090660so1.pdf [file IAI.01491-14_zii999090660so1.pdf]

**A**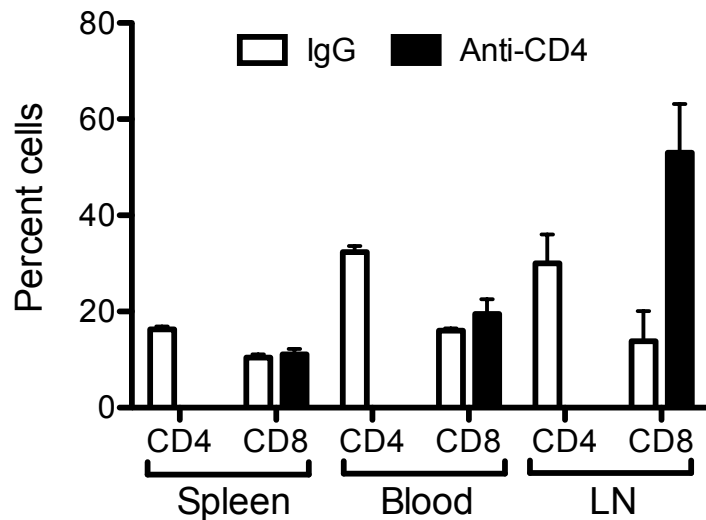**B**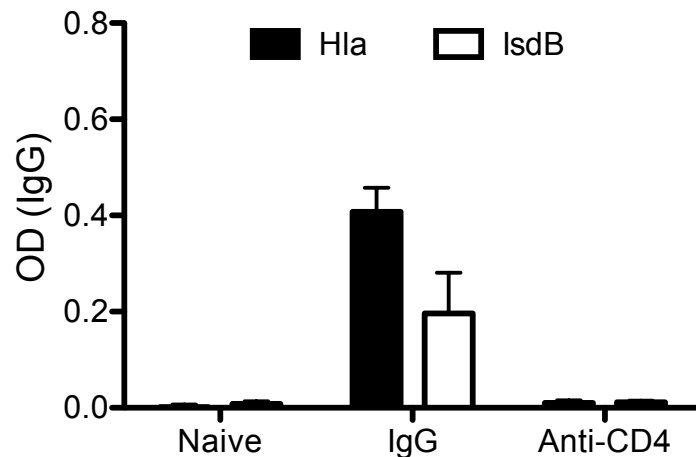

**Supplementary Figure 1. Treatment with an anti-CD4 antibody resulted in depletion of CD4+ T cells and prevented antibody responses.** (A) Treatment of BALB/c mice with an anti-CD4 antibody resulted in depletion of CD4+ T cells 3 d after infection, compared with no treatment or treatment with an isotype control antibody (IgG). (B) CD4+ T cell depletion prior to primary infection resulted in undetectable levels of antibody against  $\alpha$ -hemolysin (Hla) or iron regulated surface determinant B (IsdB) 8 wks after infection. Data are presented as mean  $\pm$  SEM. The results of one representative experiment are presented; each was repeated at least once.
