# Supplementary material
Source: PubMed Central journal article supplement (PMC3993461)
Supplement: IAI.01491-14_zii999090660so2.pdf [file IAI.01491-14_zii999090660so2.pdf]

**A**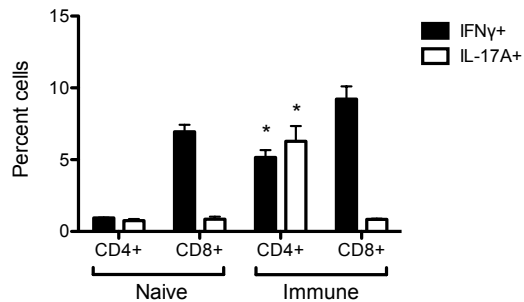**B**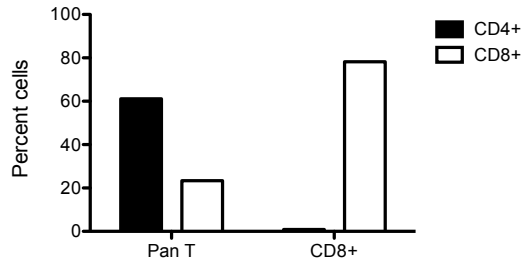**C**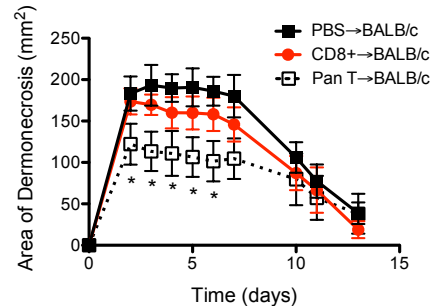

**Supplementary Figure 2. CD4<sup>+</sup> T cell responses contributed to protective immunity.** (A) There were higher percentages of CD4<sup>+</sup> IFN $\gamma$ <sup>+</sup> and IL-17A<sup>+</sup> staining T cells by ICS in adoptively transferred immune BALB/c T cells, compared with naïve T cells. In contrast, there were no differences in CD8<sup>+</sup> T cell populations between naïve and immune T cells. (B) Percentage of CD4<sup>+</sup> and CD8<sup>+</sup> T cells in adoptively transferred T cells ("Pan T") by flow cytometry. Purification of CD8<sup>+</sup> T cells resulted in undetectable percentages of CD4<sup>+</sup> T cells. (C) Adoptive transfer of immune BALB/c CD8<sup>+</sup> T cells did not confer protection in BALB/c mice (n=5 mice/group). \* indicates p < 0.05 compared with the naïve group. Data are presented as mean  $\pm$  SEM. The results of one representative experiment are presented; each was repeated at least once.
