# Supplementary material
Source: PubMed Central journal article supplement (PMC3993461)
Supplement: IAI.01491-14_zii999090660so4.pdf [file IAI.01491-14_zii999090660so4.pdf]

**A**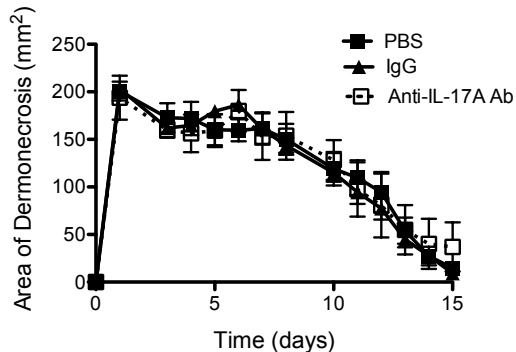**B**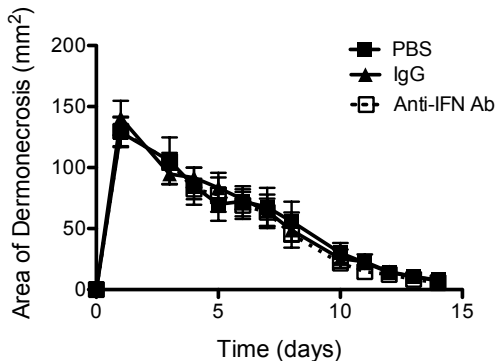

**Supplementary Figure 4. Neutralization of IL-17A or IFN had no effect on primary infection.** (A) Treatment with IL-17A neutralizing antibody prior to primary infection of BALB/c mice had no effect on lesion size (n=5 mice/group). (B) Treatment of C57BL/6 with IFN neutralizing antibody prior to primary infection had no effect on lesion size (n=5 mice/group). Data are presented as mean  $\pm$  SEM. The results of one representative experiment are presented; each was repeated at least once.
